# Supplementary material for: Derivatives of Amaryllidaceae Alkaloid Ambelline as Selective Inhibitors of Hepatic Stage of Plasmodium berghei Infection In Vitro
Source: MDPI journal article supplement (doi:10.3390/pharmaceutics15031007), 2023-03-21
Supplement: s1 [file s1]

Supplementary material for:

## **Derivatives of Amaryllidaceae Alkaloid Ambelline as Selective Inhibitors of Hepatic Stage of *Plasmodium* Infection *In Vitro***

Kateřina Hradiská Breiterová\*, Aneta Ritomská<sup>1</sup>, Diana Fontinha<sup>2</sup>, Jana Křoustková<sup>1</sup>, Daniela Suchánková<sup>1</sup>, Anna Hošťálková<sup>1</sup>, Marcela Šafratová<sup>1</sup>, Eliška Kohelová<sup>1</sup>, Rozálie Peřinová<sup>1</sup>, Rudolf Vrabec<sup>1</sup>, Denise Francisco<sup>2</sup>, Miguel Prudêncio<sup>2</sup> and Lucie Cahlíková<sup>1,\*</sup>

<sup>1</sup> Secondary metabolites of plants as potential drugs Research Group, Department of Pharmacognosy and Pharmaceutical Botany, Faculty of Pharmacy, Charles University, Heyrovského 1203, 500 05 Hradec Králové, Czech Republic

<sup>2</sup> Prudêncio Lab, Instituto de Medicina Molecular João Lobo Antunes, Faculdade de Medicina, Universidade de Lisboa, Av. Prof. Egas Moniz, Edf. Egas Moniz, 1649-028 Lisboa, Portugal

\*Correspondence: cahlikova@faf.cuni.cz (L.C.),

## Table of content

|                                                                                                |    |
|------------------------------------------------------------------------------------------------|----|
| 1) MS and NMR spectra of 11- <i>O</i> -(3,5-Dimethylbenzoyl)ambelline ( <b>28h</b> ) .....     | 3  |
| 2) MS and NMR spectra of 11- <i>O</i> -(3,5-Dimethoxybenzoyl)ambelline ( <b>28m</b> ) .....    | 4  |
| 3) MS and NMR spectra of 11- <i>O</i> -(3,4,5-Trimethoxybenzoyl)ambelline ( <b>28n</b> ) ..... | 6  |
| 4) MS and NMR spectra of 11- <i>O</i> -(4-Methyl-3-nitrobenzoyl)ambelline ( <b>28r</b> ) ..... | 7  |
| 5) MS and NMR spectra of 11- <i>O</i> -(2-Chloro-4-nitrobenzoyl)ambelline ( <b>28s</b> ) ..... | 9  |
| 6) MS and NMR spectra of 11- <i>O</i> -(4-Chloro-3-nitrobenzoyl)ambelline ( <b>28t</b> ).....  | 10 |

1) 11-O-(3,5-Dimethylbenzoyl)ambelline (28h)

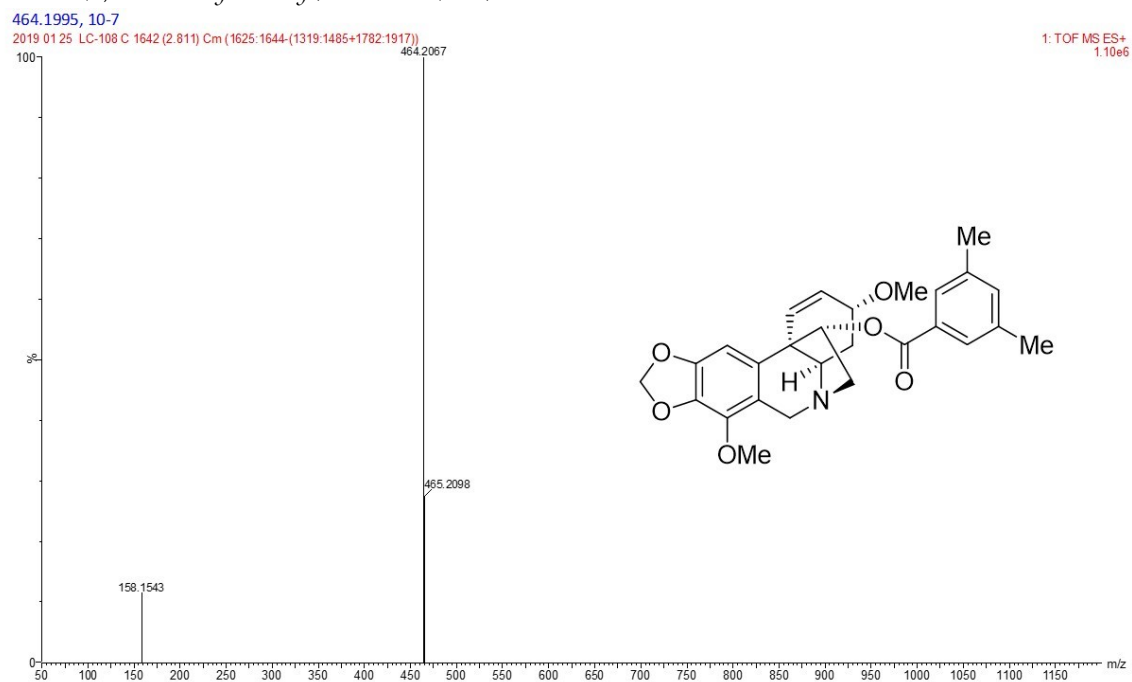

Figure S1. ESI-HRMS spectrum of 11-O-(3,5-dimethylbenzoyl)ambelline (28h)

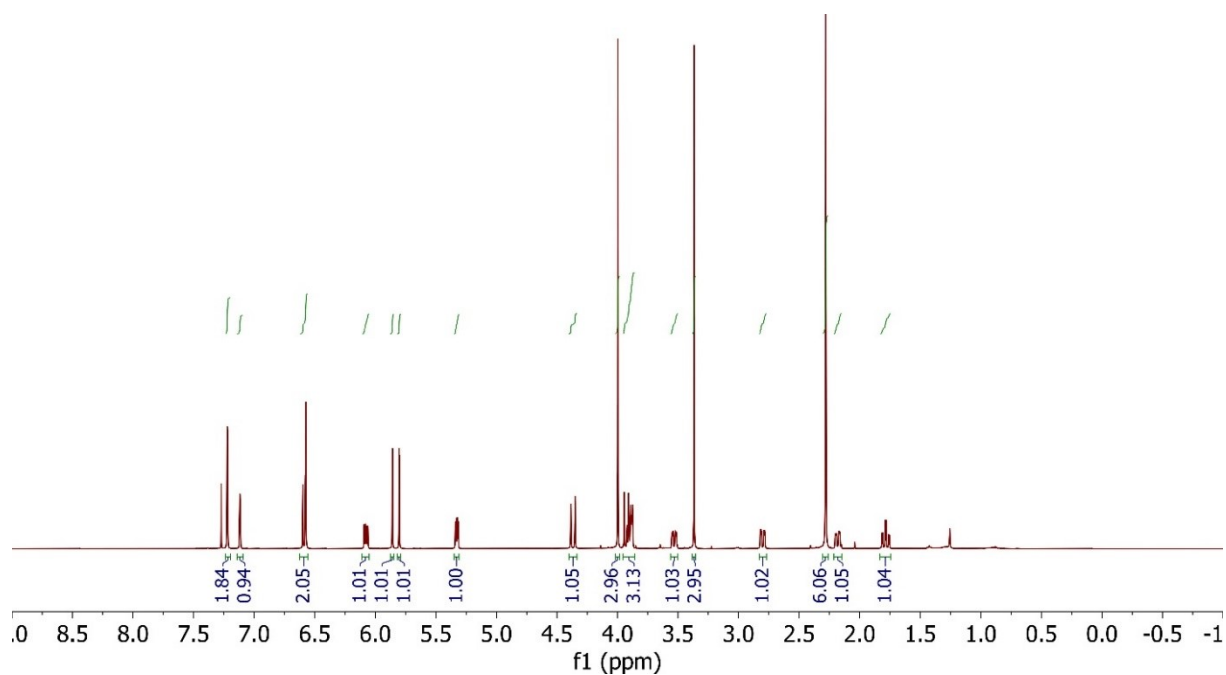

Figure S2. <sup>1</sup>H NMR spectrum of 11-O-(3,5-dimethylbenzoyl)ambelline (28h)

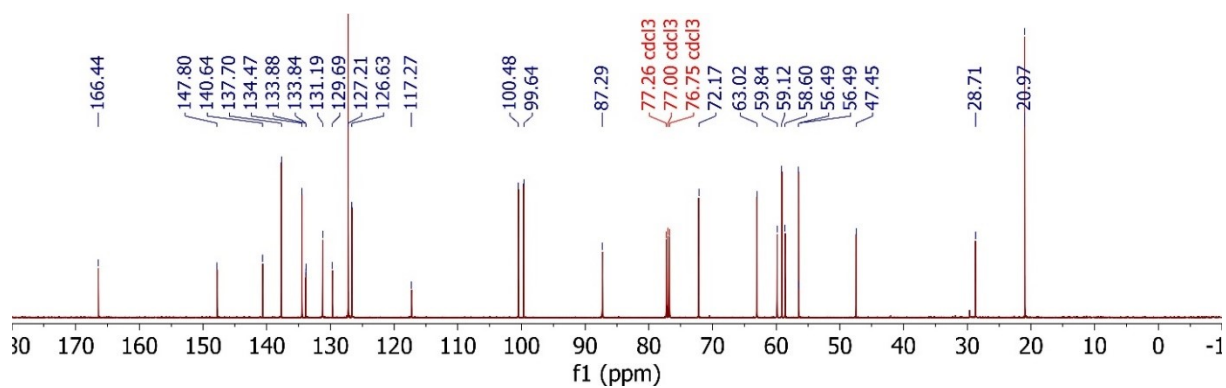

**Figure S3.**  $^{13}\text{C}$  NMR spectrum of 11-O-(3,5-dimethylbenzoyl)ambelline (**28h**)

2) 11-O-(3,5-Dimethoxybenzoyl)ambelline (**28m**)

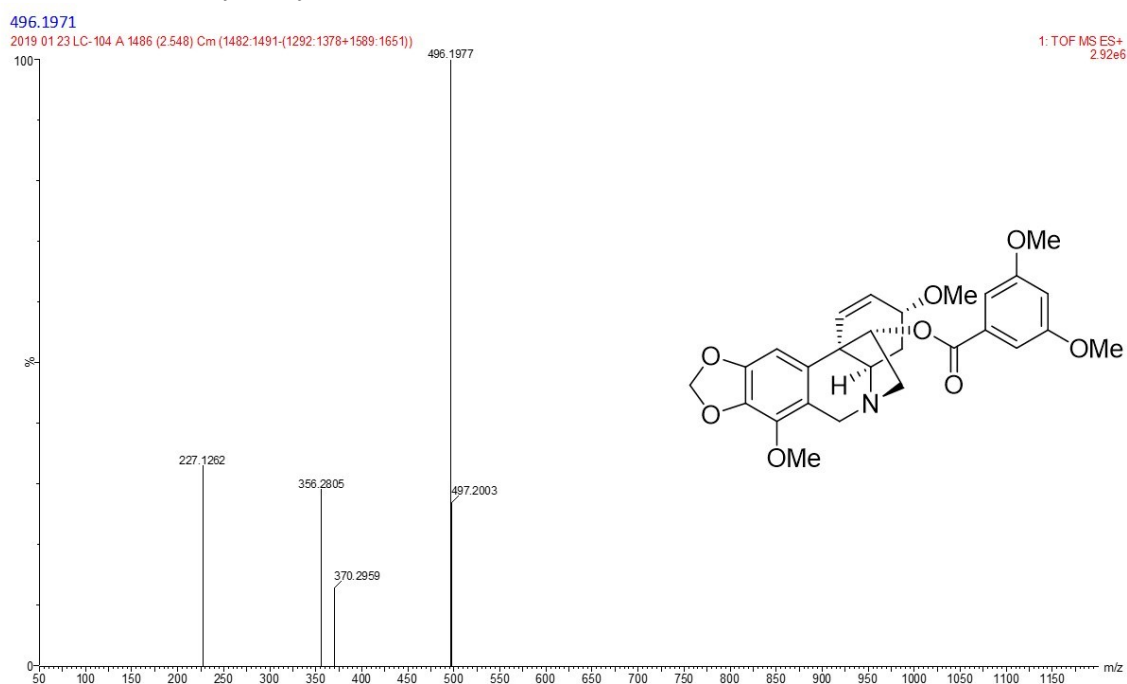

**Figure S4.** ESI-HRMS spectrum of 11-O-(3,5-dimethoxybenzoyl)ambelline (**28m**)

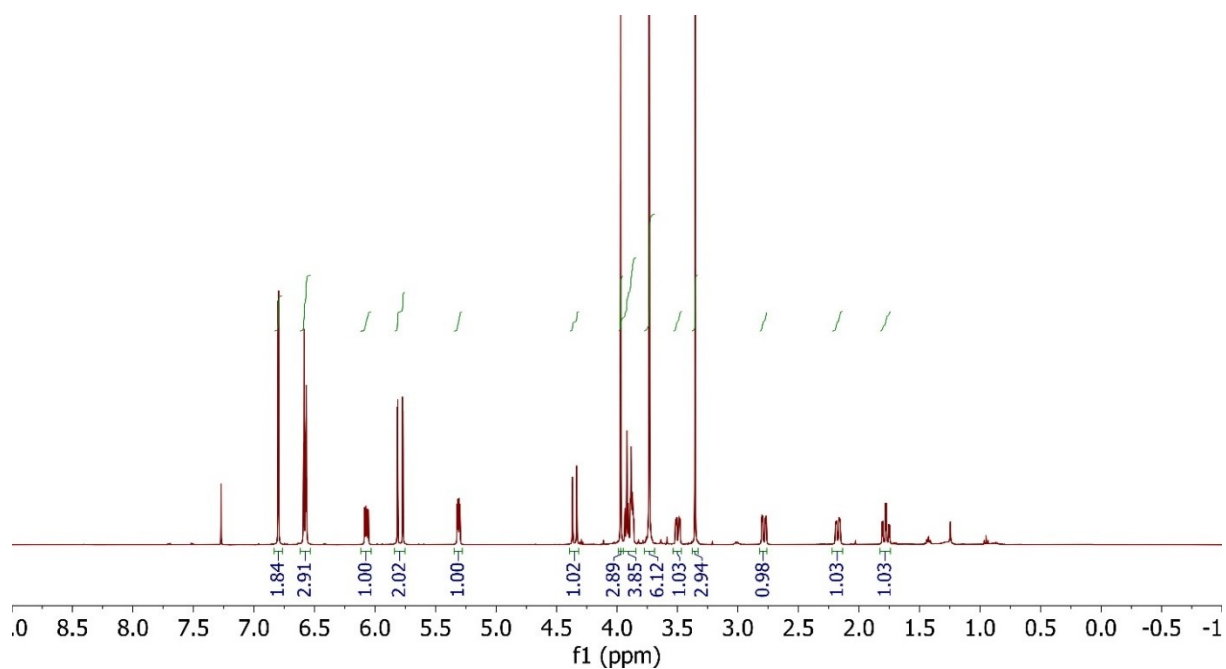

**Figure S5.** <sup>1</sup>H NMR spectrum of 11-O-(3,5-dimethoxybenzoyl)ambelline (**28m**)

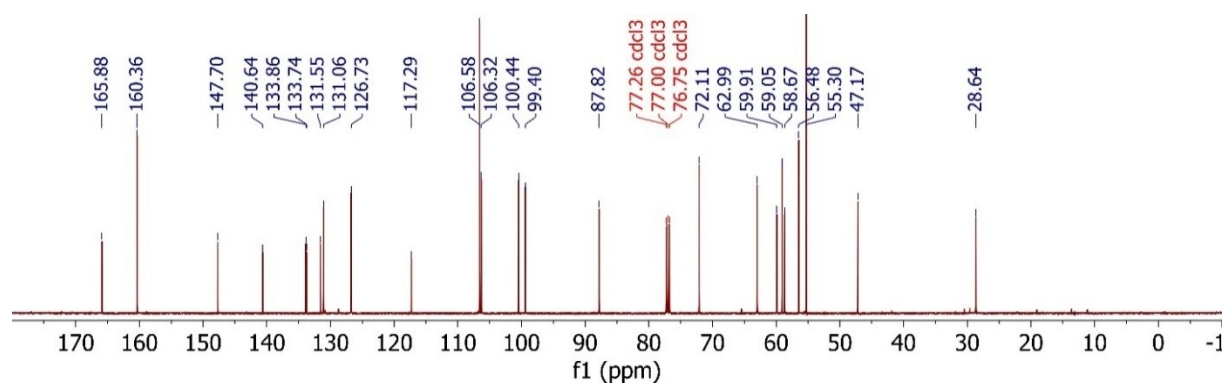

**Figure S6.** <sup>13</sup>C NMR spectrum of 11-O-(3,5-dimethoxybenzoyl)ambelline (**28m**)

3) 11-O-(3,4,5-Trimethoxybenzoyl)ambelline (**28n**)

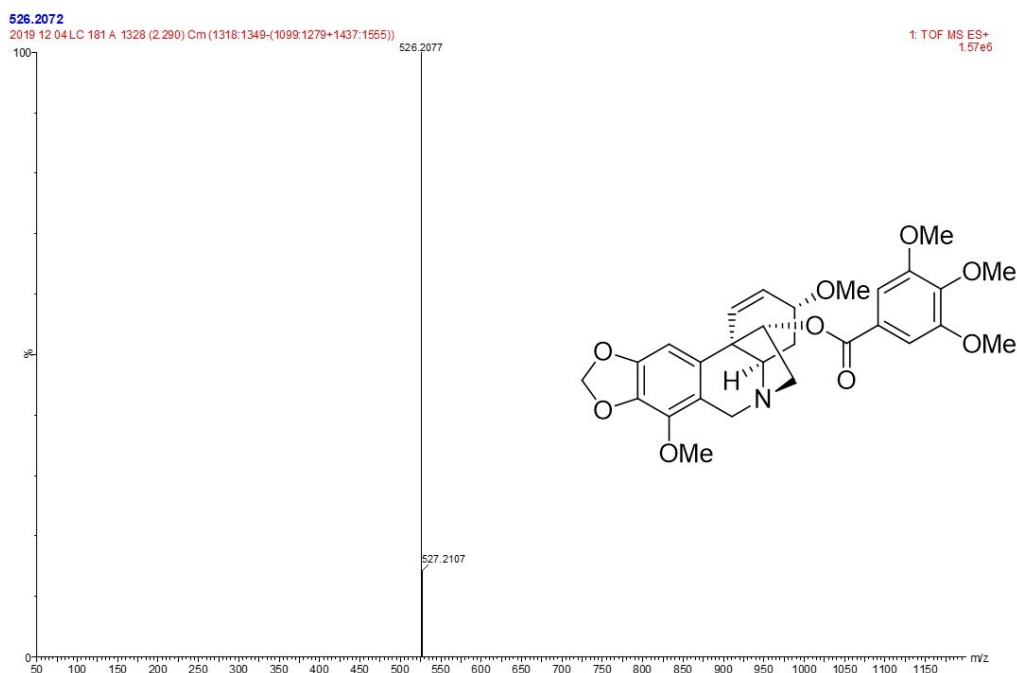

Figure S7. ESI-HRMS spectrum of 11-O-(3,4,5-trimethoxybenzoyl)ambelline (**28n**)

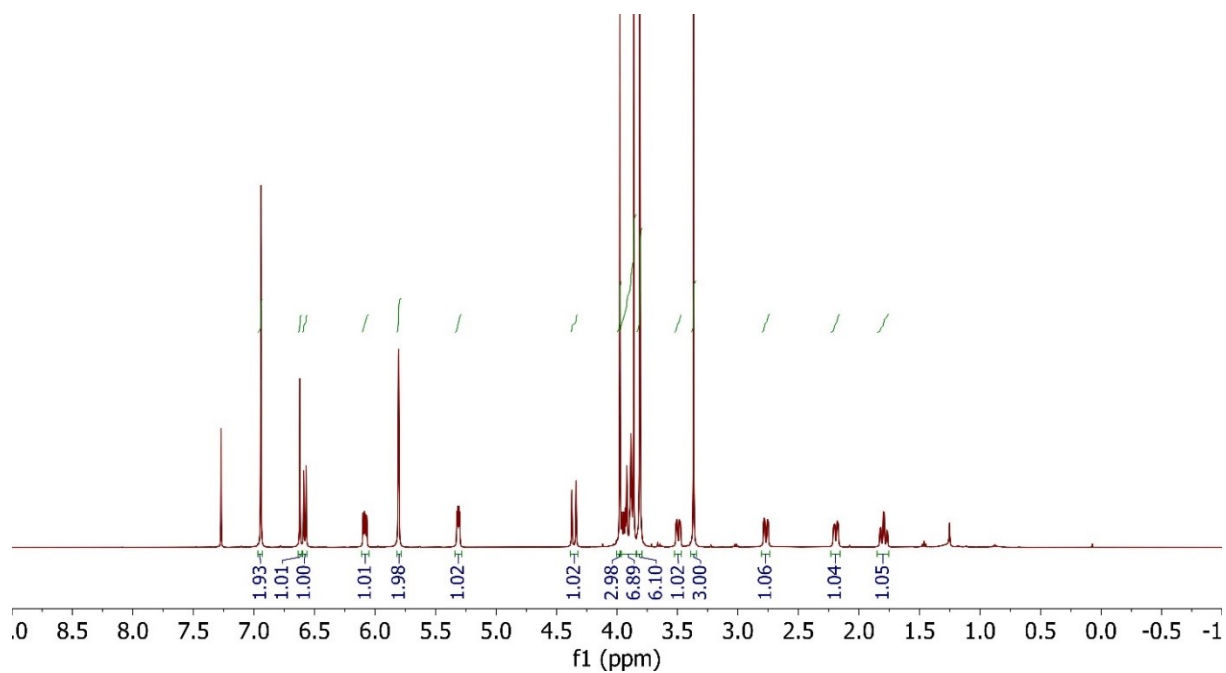

Figure S8.  $^1\text{H}$  NMR spectrum of 11-O-(3,4,5-trimethoxybenzoyl)ambelline (**28n**)

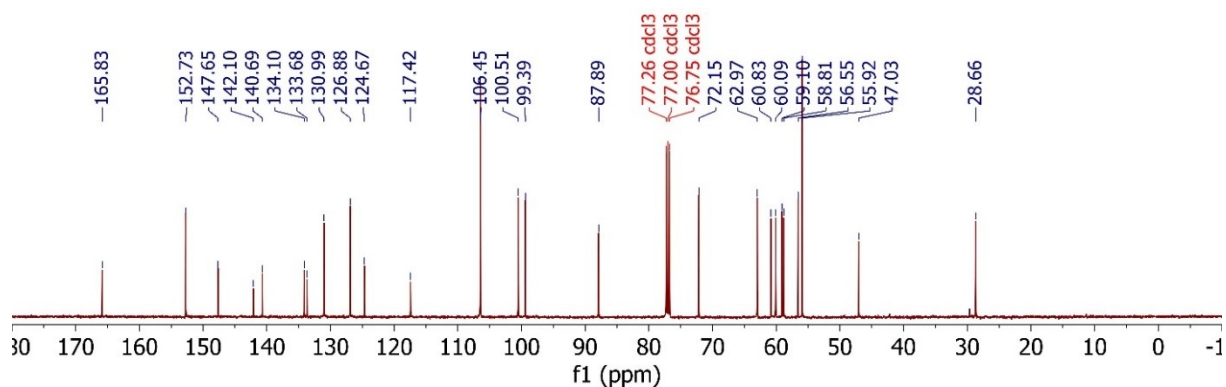

4) 11-O-(4-Methyl-3-nitrobenzoyl)ambelline (**28r**)

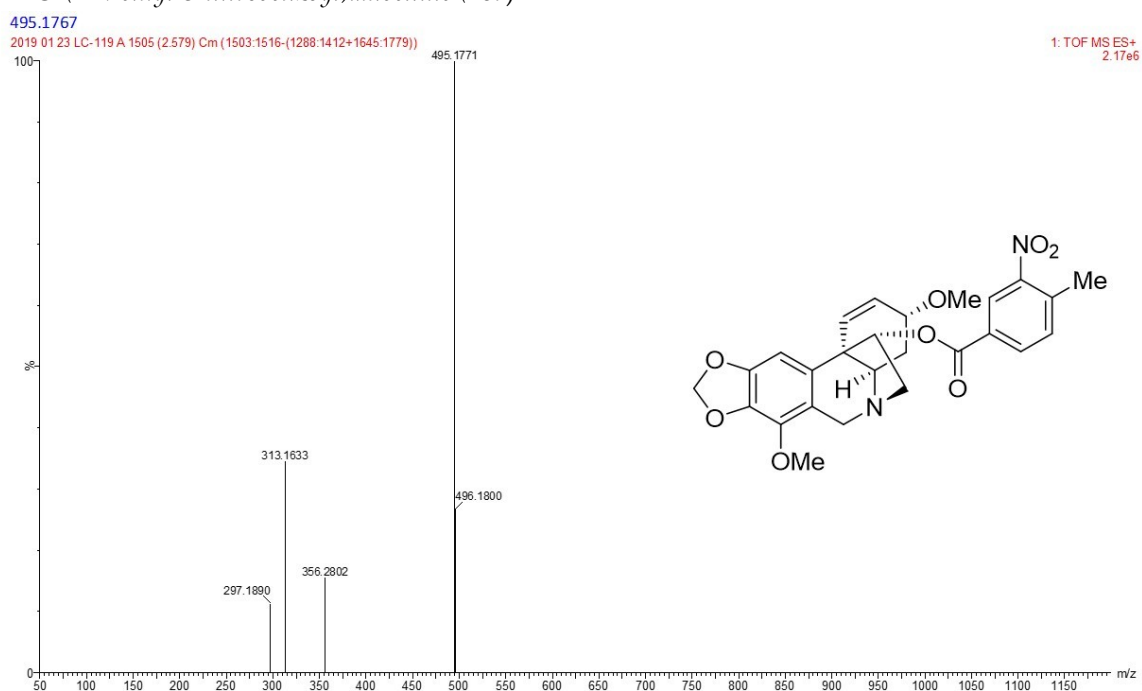

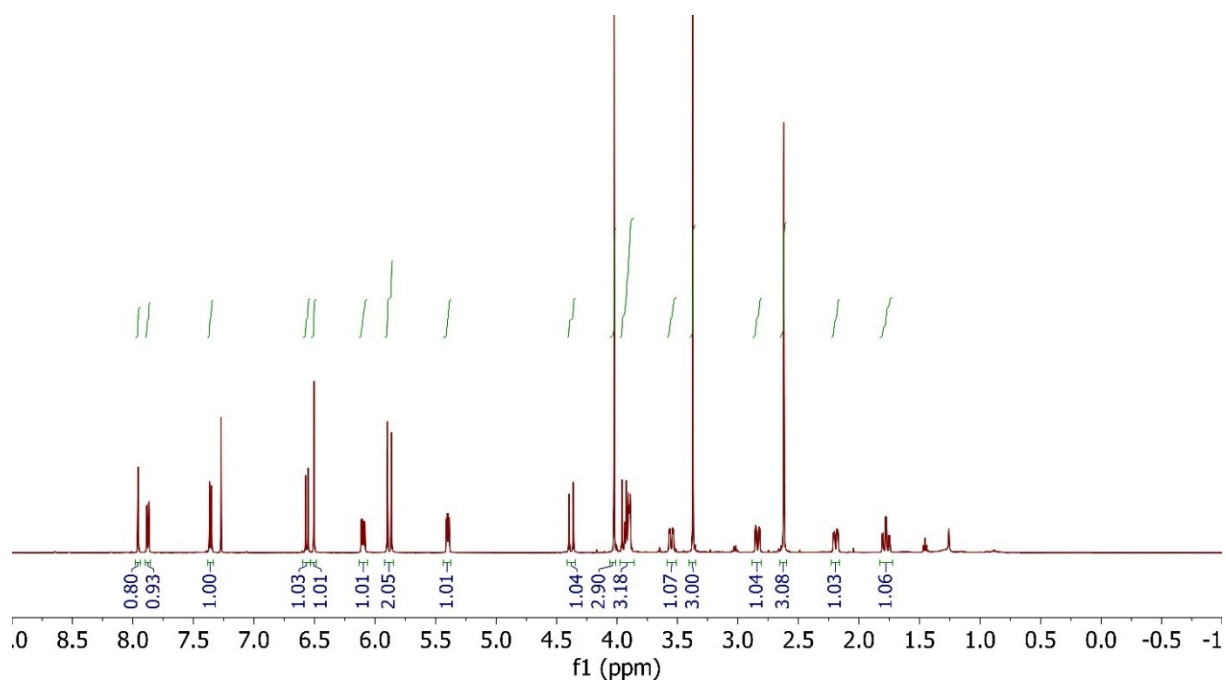

**Figure S11.** <sup>1</sup>H NMR spectrum of 11-O-(4-methyl-3-nitrobenzoyl)ambelline (**28r**)

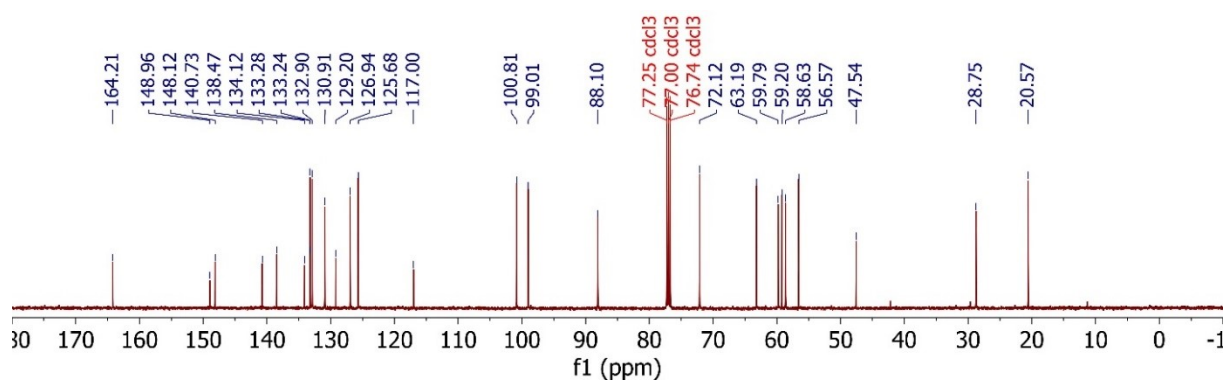

**Figure S12.** <sup>13</sup>C NMR spectrum of 11-O-(4-methyl-3-nitrobenzoyl)ambelline (**28r**)



5) 11-O-(2-Chloro-4-nitrobenzoyl)ambelline (28s)

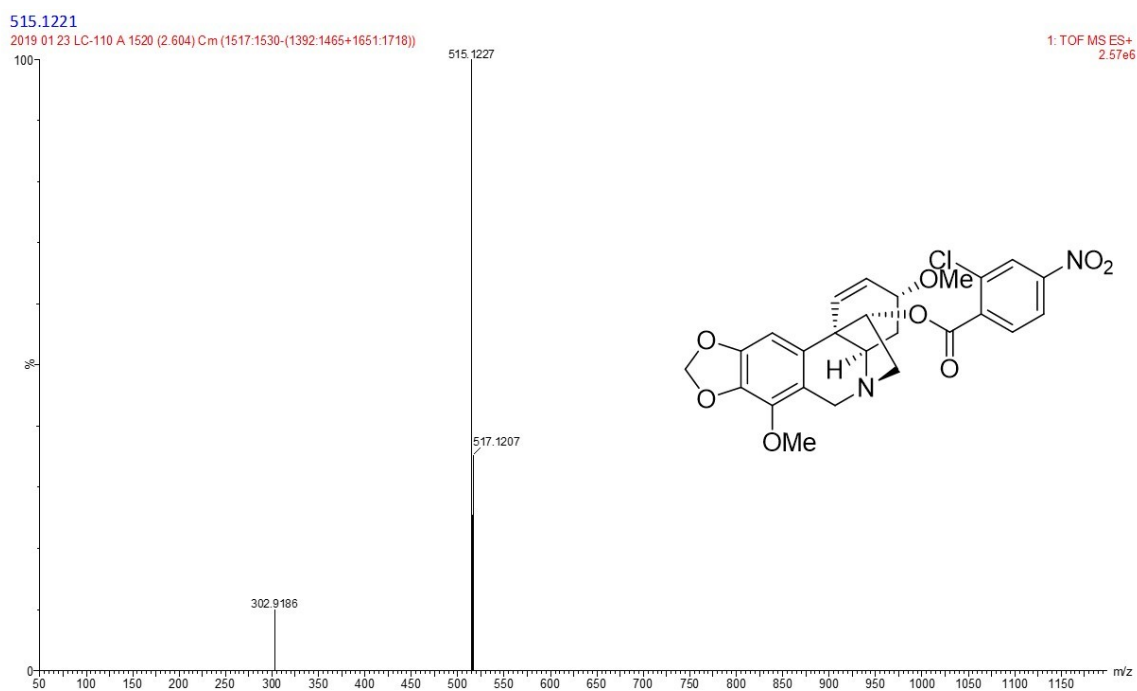

Figure S13. ESI-HRMS spectrum of 11-O-(2-chloro-4-nitrobenzoyl)ambelline (28s)

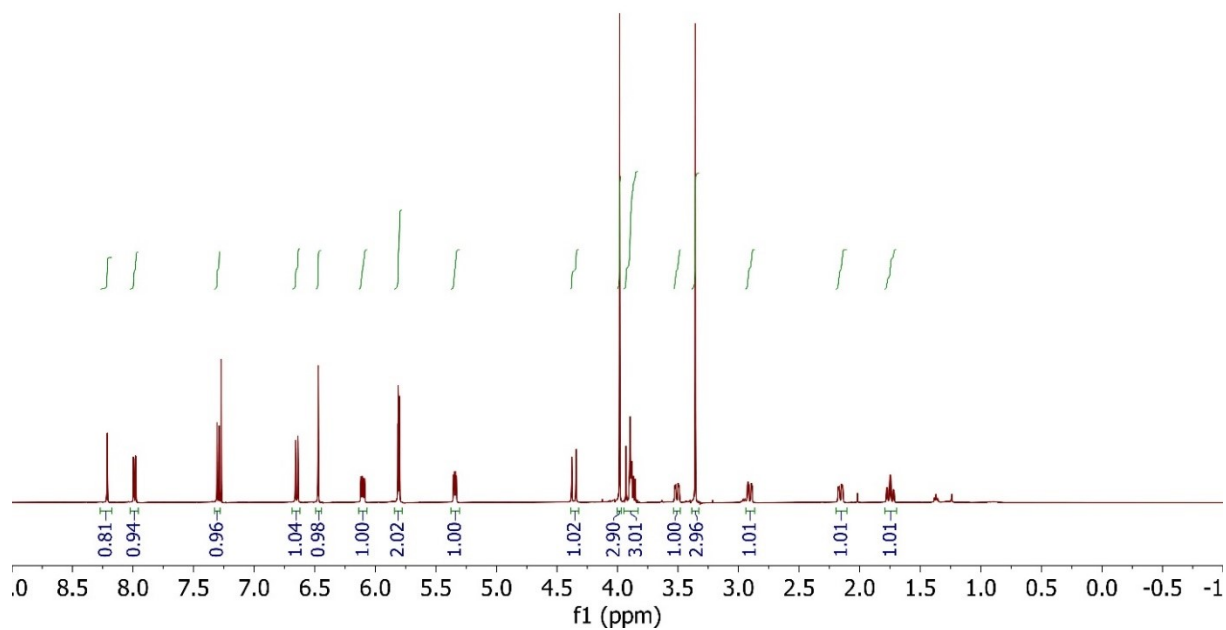

Figure S14. <sup>1</sup>H NMR spectrum of 11-O-(2-chloro-4-nitrobenzoyl)ambelline (28s)

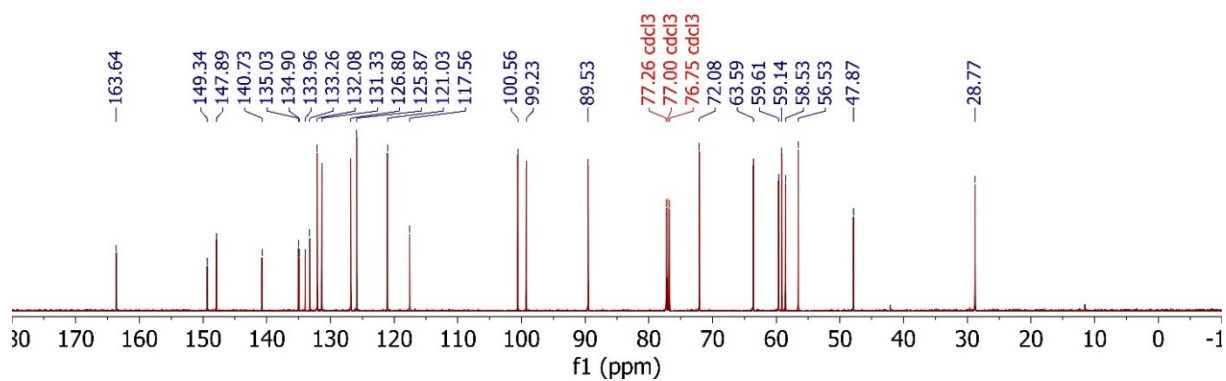

**Figure S15.**  $^{13}\text{C}$  NMR spectrum of 11-O-(2-chloro-4-nitrobenzoyl)ambelline (**28s**)

6) 11-O-(4-Chloro-3-nitrobenzoyl)ambelline (**28t**)

ESI-HRMS  $m/z$  calcd for  $\text{C}_{25}\text{H}_{23}\text{ClN}_2\text{O}_8$   $[\text{M}+\text{H}]^+$  515.1216 found 515.1224.

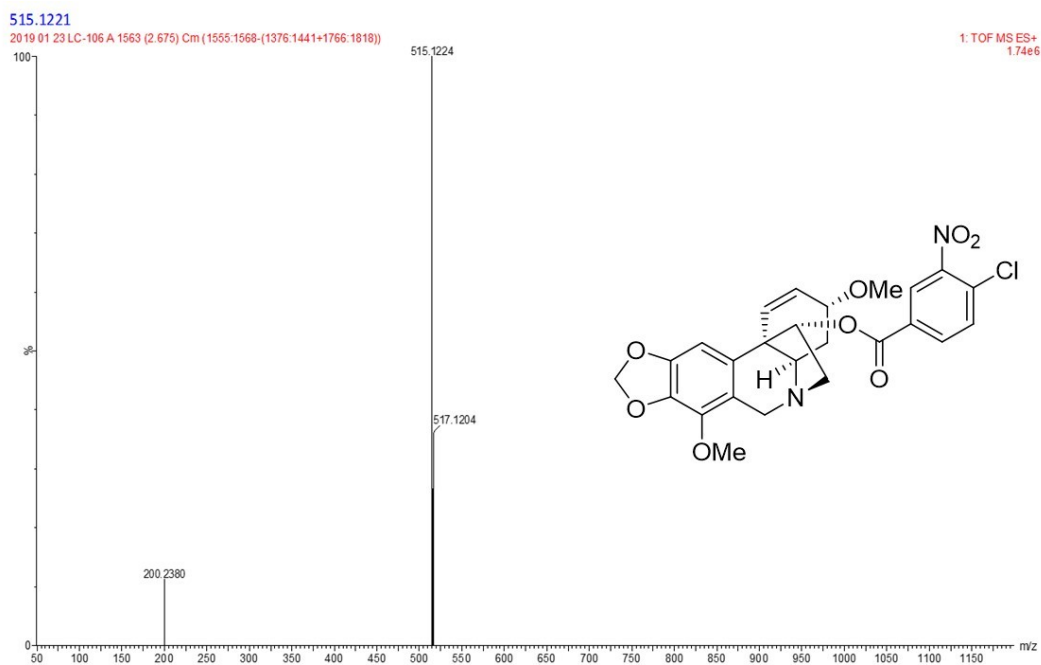

**Figure S16.** ESI-HRMS spectrum of 11-O-(4-chloro-3-nitrobenzoyl)ambelline (**28t**)

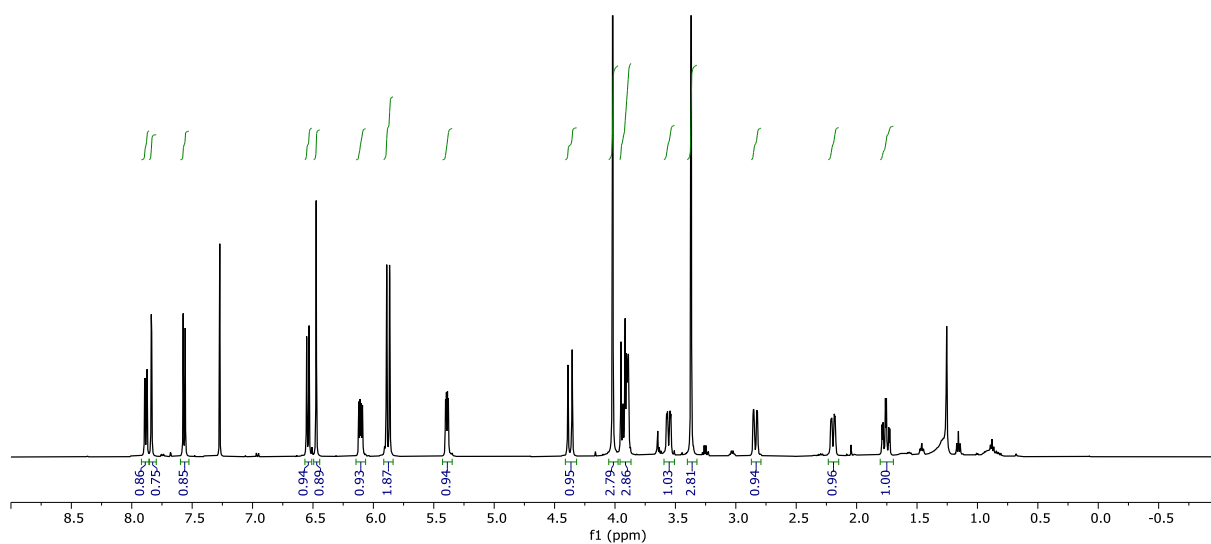

Figure S17. <sup>1</sup>H NMR spectrum of 11-O-(4-chloro-3-nitrobenzoyl)ambelline (28t)

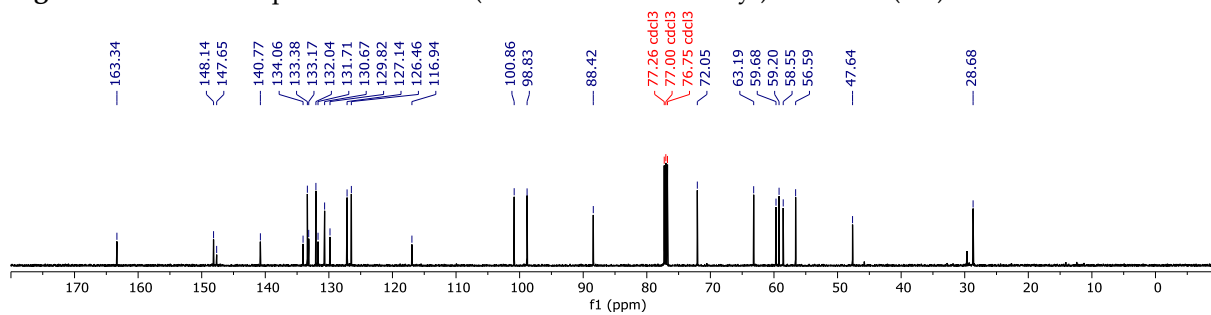

Figure S18. <sup>13</sup>C NMR spectrum of 11-O-(4-chloro-3-nitrobenzoyl)ambelline (28t)
